# Supplementary material for: Discovery of a new inhibitor targeting PD-L1 for cancer immunotherapy
Source: PubMed Central journal article supplement — Neoplasia. 2021 Jan 30;23(3):281–93. doi: 10.1016/j.neo.2021.01.001 (PMC7851350; doi:10.1016/j.neo.2021.01.001), 2021-01-30
Supplement: mmc1.pdf [file mmc1.pdf]

**Supplementary Table 1. Transcripts differentially expressed in APBC treated group compared to the vehicle control group.**

| Gene Symbol | Control Expression | APBC treated_ Expression | log2 (APBC treated/Control) | Pvalue   | Qvalue   |
|-------------|--------------------|--------------------------|-----------------------------|----------|----------|
| Eif4g1      | 4.0100             | 0.0000                   | -25.1570                    | 1.20E-10 | 1.54E-07 |
| Cntfr       | 8.5033             | 0.0233                   | -24.7053                    | 2.56E-10 | 2.70E-07 |
| Sec31a      | 3.2667             | 0.0000                   | -24.4763                    | 3.74E-10 | 3.73E-07 |
| Mdm4        | 1.5800             | 0.0000                   | -24.1807                    | 6.06E-10 | 5.63E-07 |
| Pcnx3       | 1.2500             | 0.0000                   | -23.8994                    | 9.56E-10 | 7.68E-07 |
| Sdcbp       | 3.1133             | 0.0000                   | -23.6482                    | 1.43E-09 | 1.10E-06 |
| Dnajc18     | 1.4467             | 0.0000                   | -23.5790                    | 1.60E-09 | 1.19E-06 |
| Cnot1       | 0.9367             | 0.0000                   | -23.5512                    | 3.70E-11 | 6.86E-08 |
| Tfe3        | 2.3867             | 0.0000                   | -23.5204                    | 1.75E-09 | 1.26E-06 |
| Snn         | 2.5533             | 0.0000                   | -23.4593                    | 1.31E-10 | 1.64E-07 |
| Gpr161      | 0.9767             | 0.0000                   | -23.4518                    | 1.95E-09 | 1.36E-06 |
| Cipc        | 1.5900             | 0.0000                   | -23.4221                    | 2.05E-09 | 1.41E-06 |
| Vps8        | 1.2433             | 0.0000                   | -23.3666                    | 2.23E-09 | 1.46E-06 |
| Zfp384      | 1.9133             | 0.0000                   | -23.3666                    | 2.23E-09 | 1.46E-06 |
| Spen        | 0.4800             | 0.0000                   | -23.2932                    | 2.51E-09 | 1.59E-06 |
| Setd2       | 0.6400             | 0.0000                   | -23.2458                    | 2.70E-09 | 1.69E-06 |
| Zzef1       | 0.4533             | 0.0000                   | -23.1820                    | 2.99E-09 | 1.85E-06 |
| Fbxo30      | 1.2200             | 0.0000                   | -23.1360                    | 3.20E-09 | 1.94E-06 |
| Tnik        | 0.4900             | 0.0000                   | -23.1168                    | 3.31E-09 | 1.98E-06 |
| Zkscan1     | 0.6533             | 0.0000                   | -23.0925                    | 3.43E-09 | 2.02E-06 |
| Phc3        | 0.4333             | 0.0000                   | -23.0829                    | 3.48E-09 | 2.02E-06 |
| Cbfa2t2     | 0.8300             | 0.0000                   | -23.0738                    | 3.53E-09 | 2.02E-06 |
| Zc3h14      | 1.9033             | 0.0000                   | -23.0575                    | 3.63E-09 | 2.03E-06 |
| Rabl6       | 1.4900             | 0.0000                   | -23.0200                    | 3.84E-09 | 2.09E-06 |
| Ift74       | 2.4067             | 0.0000                   | -23.0175                    | 3.86E-09 | 2.09E-06 |
| Ncoa2       | 0.5967             | 0.0000                   | -23.0175                    | 3.86E-09 | 2.09E-06 |
| Prkcsb      | 2.5167             | 0.0000                   | -23.0147                    | 3.88E-09 | 2.09E-06 |
| Gpbp111     | 1.7767             | 0.0000                   | -22.9885                    | 4.03E-09 | 2.15E-06 |
| Lrch3       | 0.5667             | 0.0000                   | -22.9841                    | 4.06E-09 | 2.15E-06 |
| Rnf170      | 1.1700             | 0.0000                   | -22.9409                    | 4.35E-09 | 2.19E-06 |
| Ivns1abp    | 1.2133             | 0.0000                   | -22.9269                    | 4.44E-09 | 2.20E-06 |
| Gigyf2      | 0.7400             | 0.0000                   | -22.9184                    | 4.50E-09 | 2.20E-06 |
| Arhgap12    | 0.9067             | 0.0000                   | -22.9173                    | 4.51E-09 | 2.20E-06 |
| Mapre2      | 1.1600             | 0.0000                   | -22.9142                    | 4.53E-09 | 2.20E-06 |
| Bod11       | 0.4733             | 0.0000                   | -22.9073                    | 4.58E-09 | 2.20E-06 |
| Scaf4       | 0.9433             | 0.0000                   | -22.8750                    | 4.81E-09 | 2.27E-06 |
| Pla2g6      | 1.2200             | 0.0000                   | -22.8690                    | 4.86E-09 | 2.27E-06 |
| Usp54       | 0.5800             | 0.0000                   | -22.7988                    | 5.41E-09 | 2.45E-06 |
| Nsmce1      | 4.4400             | 0.0000                   | -22.7556                    | 5.79E-09 | 2.57E-06 |
| Usp11       | 1.1000             | 0.0000                   | -22.7556                    | 5.79E-09 | 2.57E-06 |
| Ptprs       | 0.5667             | 0.0000                   | -22.7250                    | 6.07E-09 | 2.68E-06 |
| Picalm      | 0.9833             | 0.0000                   | -22.7053                    | 6.25E-09 | 2.72E-06 |
| Ythdf3      | 0.7467             | 0.0000                   | -22.7046                    | 6.26E-09 | 2.72E-06 |
| Morf4l2     | 2.1400             | 0.0000                   | -22.6861                    | 6.44E-09 | 2.77E-06 |
| Kcnab2      | 1.0100             | 0.0000                   | -22.6817                    | 6.48E-09 | 2.77E-06 |
| Golgb1      | 0.3400             | 0.0000                   | -22.6421                    | 6.89E-09 | 2.91E-06 |
| Mtdh        | 0.8600             | 0.0000                   | -22.6288                    | 7.03E-09 | 2.92E-06 |
| Ccp110      | 0.7567             | 0.0000                   | -22.6261                    | 7.06E-09 | 2.92E-06 |
| Usp19       | 0.7933             | 0.0000                   | -22.6103                    | 7.23E-09 | 2.95E-06 |
| Far1        | 0.8300             | 0.0000                   | -22.6058                    | 7.28E-09 | 2.95E-06 |
| Pik3r1      | 0.6133             | 0.0000                   | -22.6058                    | 7.28E-09 | 2.95E-06 |
| Sf1         | 0.9567             | 0.0000                   | -22.5909                    | 7.45E-09 | 2.99E-06 |
| Edc4        | 0.7367             | 0.0000                   | -22.5857                    | 7.51E-09 | 2.99E-06 |

|          |        |        |          |          |          |
|----------|--------|--------|----------|----------|----------|
| Med1     | 0.5100 | 0.0000 | -22.5823 | 7.55E-09 | 2.99E-06 |
| Maff     | 2.4400 | 0.0000 | -22.5691 | 7.69E-09 | 3.02E-06 |
| Cntrl    | 0.4267 | 0.0000 | -22.5494 | 7.94E-09 | 3.10E-06 |
| Srsf5    | 1.9800 | 0.0000 | -22.5415 | 8.04E-09 | 3.10E-06 |
| Stk24    | 0.9200 | 0.0000 | -22.5375 | 8.07E-09 | 3.10E-06 |
| Birc6    | 0.2000 | 0.0000 | -22.5257 | 8.23E-09 | 3.14E-06 |
| Mpdz     | 0.4200 | 0.0000 | -22.5178 | 8.33E-09 | 3.16E-06 |
| Meis2    | 0.7133 | 0.0000 | -22.5139 | 8.38E-09 | 3.16E-06 |
| Gon4l    | 0.4333 | 0.0000 | -22.4903 | 8.69E-09 | 3.20E-06 |
| Lhfp12   | 0.7533 | 0.0000 | -22.4571 | 9.14E-09 | 3.30E-06 |
| Rangap1  | 1.3933 | 0.0000 | -22.4527 | 9.20E-09 | 3.30E-06 |
| Fam135a  | 0.7733 | 0.0000 | -22.4497 | 9.24E-09 | 3.30E-06 |
| Srrm1    | 0.8533 | 0.0000 | -22.4417 | 9.36E-09 | 3.30E-06 |
| Itga8    | 0.5133 | 0.0000 | -22.4358 | 9.44E-09 | 3.30E-06 |
| Itrp1    | 0.3000 | 0.0000 | -22.4273 | 9.56E-09 | 3.31E-06 |
| Fam13b   | 0.8000 | 0.0000 | -22.4188 | 9.69E-09 | 3.31E-06 |
| Immt     | 1.0933 | 0.0000 | -22.4188 | 9.69E-09 | 3.31E-06 |
| Tmem184b | 0.9467 | 0.0000 | -22.4167 | 9.72E-09 | 3.31E-06 |
| Pld1     | 0.6267 | 0.0000 | -22.4083 | 9.84E-09 | 3.31E-06 |
| Zcchc2   | 0.5467 | 0.0000 | -22.4083 | 9.84E-09 | 3.31E-06 |
| Atp9a    | 1.9633 | 0.0000 | -22.3999 | 9.89E-09 | 3.31E-06 |
| Gng2     | 1.9733 | 0.0000 | -22.3811 | 1.02E-08 | 3.38E-06 |
| Iffo1    | 0.9967 | 0.0000 | -22.3784 | 1.03E-08 | 3.38E-06 |
| Myo5a    | 0.3367 | 0.0000 | -22.3779 | 1.03E-08 | 3.38E-06 |
| Begain   | 1.1400 | 0.0000 | -22.3699 | 1.04E-08 | 3.40E-06 |
| Cic      | 0.3667 | 0.0000 | -22.3662 | 1.05E-08 | 3.40E-06 |
| Vamp7    | 1.1933 | 0.0067 | -22.3599 | 1.06E-08 | 3.42E-06 |
| Myo7a    | 0.3667 | 0.0000 | -22.3447 | 1.08E-08 | 3.45E-06 |
| Mgat4a   | 0.3800 | 0.0000 | -22.3347 | 1.10E-08 | 3.45E-06 |
| Dst      | 0.1267 | 0.0000 | -22.3341 | 1.10E-08 | 3.45E-06 |
| Patj     | 0.3933 | 0.0000 | -22.3341 | 1.10E-08 | 3.45E-06 |
| Aptx     | 0.4967 | 0.0000 | -22.3016 | 1.16E-08 | 3.55E-06 |
| Ccdc93   | 0.3700 | 0.0000 | -22.2953 | 1.17E-08 | 3.55E-06 |
| Zfp655   | 0.6600 | 0.0000 | -22.2953 | 1.17E-08 | 3.55E-06 |
| Arrdc2   | 1.2233 | 0.0000 | -22.2794 | 1.20E-08 | 3.59E-06 |
| Ubn1     | 0.4500 | 0.0000 | -22.2773 | 1.20E-08 | 3.59E-06 |
| Nav1     | 0.1933 | 0.0000 | -22.2300 | 1.29E-08 | 3.78E-06 |
| Gm46911  | 2.6567 | 0.0000 | -22.2153 | 1.31E-08 | 3.78E-06 |
| Col4a5   | 0.4200 | 0.0000 | -22.1713 | 1.41E-08 | 3.95E-06 |
| Urgcp    | 0.6433 | 0.0000 | -22.1694 | 1.41E-08 | 3.95E-06 |
| Bivm     | 0.8033 | 0.0000 | -22.1556 | 1.44E-08 | 4.00E-06 |
| Smtn     | 0.7633 | 0.0000 | -22.1500 | 1.45E-08 | 4.01E-06 |
| Bdp1     | 0.1933 | 0.0000 | -22.1433 | 1.47E-08 | 4.01E-06 |
| Igf1r    | 0.2367 | 0.0000 | -22.1362 | 1.49E-08 | 4.01E-06 |
| Klhl10   | 0.4333 | 0.0000 | -22.1362 | 1.49E-08 | 4.01E-06 |
| Zswim8   | 0.4200 | 0.0000 | -22.1169 | 1.53E-08 | 4.07E-06 |
| Dazap1   | 1.5433 | 0.0000 | -22.1147 | 1.53E-08 | 4.07E-06 |
| Cstf2    | 0.5967 | 0.0000 | -22.1074 | 1.55E-08 | 4.07E-06 |
| Cdk10    | 1.5100 | 0.0000 | -22.0908 | 1.59E-08 | 4.09E-06 |
| Klhl8    | 0.7667 | 0.0000 | -22.0801 | 1.62E-08 | 4.09E-06 |
| Trafd1   | 0.9867 | 0.0000 | -22.0750 | 1.63E-08 | 4.09E-06 |
| Gpank1   | 1.8433 | 0.0000 | -22.0749 | 1.63E-08 | 4.09E-06 |
| Arid4b   | 0.4133 | 0.0000 | -22.0693 | 1.64E-08 | 4.09E-06 |
| Mtbp     | 1.1833 | 0.0000 | -22.0693 | 1.64E-08 | 4.09E-06 |
| Tbc1d16  | 0.3433 | 0.0000 | -22.0693 | 1.64E-08 | 4.09E-06 |
| Exoc7    | 0.7400 | 0.0000 | -22.0685 | 1.64E-08 | 4.09E-06 |
| Nt5c2    | 0.4167 | 0.0000 | -22.0638 | 1.66E-08 | 4.09E-06 |
| Nfia     | 0.2533 | 0.0000 | -22.0474 | 1.70E-08 | 4.17E-06 |
| Apc      | 0.2733 | 0.0000 | -22.0364 | 1.73E-08 | 4.20E-06 |
| Mfn2     | 0.6033 | 0.0000 | -22.0353 | 1.72E-08 | 4.20E-06 |
| Entr1    | 1.0067 | 0.0000 | -22.0187 | 1.77E-08 | 4.27E-06 |
| Relch    | 0.4233 | 0.0000 | -22.0140 | 1.78E-08 | 4.27E-06 |
| Setdb1   | 0.4700 | 0.0000 | -22.0072 | 1.80E-08 | 4.27E-06 |

|               |        |        |          |          |          |
|---------------|--------|--------|----------|----------|----------|
| Gtpbp2        | 0.7800 | 0.0000 | -21.9914 | 1.85E-08 | 4.31E-06 |
| Morc2a        | 0.3800 | 0.0000 | -21.9840 | 1.87E-08 | 4.31E-06 |
| Rps6ka3       | 0.2867 | 0.0000 | -21.9840 | 1.87E-08 | 4.31E-06 |
| Por           | 0.8567 | 0.0000 | -21.9722 | 1.90E-08 | 4.37E-06 |
| Nup205        | 0.3267 | 0.0000 | -21.9603 | 1.93E-08 | 4.43E-06 |
| Ncald         | 0.6567 | 0.0000 | -21.9567 | 1.94E-08 | 4.43E-06 |
| Spag9         | 0.2767 | 0.0000 | -21.9483 | 1.97E-08 | 4.47E-06 |
| Clec16a       | 0.3300 | 0.0000 | -21.9361 | 2.00E-08 | 4.50E-06 |
| Dcdc2a        | 1.0200 | 0.0000 | -21.9361 | 2.00E-08 | 4.50E-06 |
| Rbpms         | 0.2433 | 0.0000 | -21.9238 | 2.04E-08 | 4.54E-06 |
| Rb1cc1        | 0.3100 | 0.0000 | -21.9229 | 2.04E-08 | 4.54E-06 |
| Ptpn3         | 0.3367 | 0.0000 | -21.9208 | 2.05E-08 | 4.54E-06 |
| Itgal         | 0.4200 | 0.0000 | -21.9118 | 2.08E-08 | 4.57E-06 |
| Pcbp2         | 1.4000 | 0.0000 | -21.9086 | 2.09E-08 | 4.57E-06 |
| Smad4         | 0.3067 | 0.0000 | -21.9006 | 2.11E-08 | 4.57E-06 |
| Msantd3       | 0.3567 | 0.0000 | -21.8999 | 2.12E-08 | 4.57E-06 |
| Tbc1d1        | 0.3733 | 0.0000 | -21.8971 | 2.12E-08 | 4.57E-06 |
| Zfp646        | 0.8300 | 0.0000 | -21.8917 | 2.12E-08 | 4.57E-06 |
| Ccdc85c       | 0.4433 | 0.0000 | -21.8894 | 2.15E-08 | 4.57E-06 |
| Atp11c        | 0.3267 | 0.0000 | -21.8868 | 2.16E-08 | 4.57E-06 |
| Zmym3         | 0.3733 | 0.0000 | -21.8868 | 2.16E-08 | 4.57E-06 |
| Btrc          | 0.3133 | 0.0000 | -21.8738 | 2.20E-08 | 4.57E-06 |
| Zfr           | 0.4300 | 0.0000 | -21.8738 | 2.20E-08 | 4.57E-06 |
| Kat2b         | 0.4567 | 0.0000 | -21.8716 | 2.21E-08 | 4.57E-06 |
| Stx2          | 0.7500 | 0.0000 | -21.8716 | 2.21E-08 | 4.57E-06 |
| D430042O09Rik | 0.3333 | 0.0000 | -21.8596 | 2.25E-08 | 4.61E-06 |
| Pdpk1         | 0.3033 | 0.0000 | -21.8596 | 2.25E-08 | 4.61E-06 |
| Ess2          | 0.7500 | 0.0000 | -21.8552 | 2.26E-08 | 4.61E-06 |
| Tpx2          | 0.4833 | 0.0000 | -21.8552 | 2.26E-08 | 4.61E-06 |
| Yeats2        | 0.3433 | 0.0000 | -21.8469 | 2.29E-08 | 4.65E-06 |
| Osbp13        | 0.3700 | 0.0000 | -21.8366 | 2.31E-08 | 4.67E-06 |
| Rusc2         | 0.3567 | 0.0000 | -21.8213 | 2.38E-08 | 4.76E-06 |
| Arhgef9       | 0.3567 | 0.0000 | -21.8212 | 2.38E-08 | 4.76E-06 |
| Bcl9          | 0.3233 | 0.0000 | -21.7945 | 2.47E-08 | 4.86E-06 |
| Lmbr1         | 0.4033 | 0.0000 | -21.7945 | 2.47E-08 | 4.86E-06 |
| Sec23b        | 0.7100 | 0.0000 | -21.7945 | 2.47E-08 | 4.86E-06 |
| Nsd1          | 0.1533 | 0.0000 | -21.7938 | 2.48E-08 | 4.86E-06 |
| Dock7         | 0.2600 | 0.0000 | -21.7927 | 2.48E-08 | 4.86E-06 |
| Entpd5        | 0.3967 | 0.0000 | -21.7808 | 2.53E-08 | 4.93E-06 |
| Chfr          | 0.6100 | 0.0000 | -21.7695 | 2.57E-08 | 4.97E-06 |
| Extl3         | 0.3067 | 0.0000 | -21.7658 | 2.58E-08 | 4.97E-06 |
| Myo9a         | 0.1500 | 0.0000 | -21.7658 | 2.58E-08 | 4.97E-06 |
| Tmem201       | 0.4867 | 0.0000 | -21.7397 | 2.68E-08 | 5.12E-06 |
| Hspg2         | 0.1300 | 0.0000 | -21.7262 | 2.74E-08 | 5.16E-06 |
| Invs          | 0.3333 | 0.0000 | -21.7262 | 2.74E-08 | 5.16E-06 |
| Ephb6         | 0.5067 | 0.0033 | -21.7205 | 2.76E-08 | 5.18E-06 |
| Skil          | 0.2867 | 0.0000 | -21.7096 | 2.81E-08 | 5.23E-06 |
| Gatad2b       | 0.2500 | 0.0000 | -21.6973 | 2.86E-08 | 5.23E-06 |
| Zc3h13        | 0.2767 | 0.0000 | -21.6959 | 2.86E-08 | 5.23E-06 |
| S100pbp       | 0.4167 | 0.0000 | -21.6953 | 2.87E-08 | 5.23E-06 |
| Pgf           | 0.8767 | 0.0000 | -21.6831 | 2.92E-08 | 5.23E-06 |
| Aldh7a1       | 0.6400 | 0.0000 | -21.6820 | 2.92E-08 | 5.23E-06 |
| Ulk1          | 0.3233 | 0.0000 | -21.6813 | 2.93E-08 | 5.23E-06 |
| Plpbp         | 0.9133 | 0.0000 | -21.6702 | 2.98E-08 | 5.27E-06 |
| Usp53         | 0.2933 | 0.0000 | -21.6702 | 2.98E-08 | 5.27E-06 |
| Akap9         | 0.1300 | 0.0000 | -21.6569 | 3.03E-08 | 5.30E-06 |
| Cep41         | 0.5167 | 0.0000 | -21.6556 | 3.04E-08 | 5.30E-06 |
| Cr11          | 1.0267 | 0.0000 | -21.6487 | 3.07E-08 | 5.30E-06 |
| Myo18a        | 0.2200 | 0.0000 | -21.6487 | 3.07E-08 | 5.30E-06 |
| 4933427D14Rik | 0.4133 | 0.0000 | -21.6438 | 3.09E-08 | 5.32E-06 |
| Ap4b1         | 0.6600 | 0.0000 | -21.6354 | 3.13E-08 | 5.33E-06 |
| Map3k4        | 0.2067 | 0.0000 | -21.6219 | 3.20E-08 | 5.34E-06 |
| Phf3          | 0.2867 | 0.0000 | -21.6219 | 3.20E-08 | 5.34E-06 |

|          |        |        |          |          |          |
|----------|--------|--------|----------|----------|----------|
| Dip2b    | 0.1833 | 0.0000 | -21.6069 | 3.27E-08 | 5.38E-06 |
| Synrg    | 0.2167 | 0.0000 | -21.6069 | 3.27E-08 | 5.38E-06 |
| Ergic1   | 0.6533 | 0.0000 | -21.6015 | 3.29E-08 | 5.38E-06 |
| Nfkbie   | 0.7400 | 0.0000 | -21.6015 | 3.29E-08 | 5.38E-06 |
| Gripap1  | 0.5733 | 0.0000 | -21.5733 | 3.43E-08 | 5.50E-06 |
| Stag2    | 0.3133 | 0.0000 | -21.5733 | 3.43E-08 | 5.50E-06 |
| Pld2     | 0.4633 | 0.0000 | -21.5728 | 3.44E-08 | 5.50E-06 |
| R3hdm2   | 0.4200 | 0.0000 | -21.5728 | 3.44E-08 | 5.50E-06 |
| Cog4     | 0.5733 | 0.0000 | -21.5586 | 3.51E-08 | 5.57E-06 |
| Pacsin2  | 0.5267 | 0.0000 | -21.5461 | 3.57E-08 | 5.62E-06 |
| Mbd1     | 0.2933 | 0.0000 | -21.5420 | 3.59E-08 | 5.64E-06 |
| Herc3    | 0.3400 | 0.0000 | -21.5323 | 3.65E-08 | 5.68E-06 |
| Lcor     | 0.1000 | 0.0000 | -21.5270 | 3.67E-08 | 5.68E-06 |
| Pip5k1c  | 0.2667 | 0.0000 | -21.5270 | 3.67E-08 | 5.68E-06 |
| Tmem87a  | 0.5200 | 0.0000 | -21.5270 | 3.67E-08 | 5.68E-06 |
| Chdh     | 0.2833 | 0.0000 | -21.5153 | 3.74E-08 | 5.69E-06 |
| Usf3     | 0.1233 | 0.0000 | -21.5153 | 3.74E-08 | 5.69E-06 |
| Zfp131   | 0.5300 | 0.0000 | -21.5153 | 3.74E-08 | 5.69E-06 |
| Gas7     | 0.2400 | 0.0000 | -21.5153 | 3.74E-08 | 5.69E-06 |
| Cpeb4    | 0.1967 | 0.0000 | -21.5090 | 3.77E-08 | 5.71E-06 |
| Dzip3    | 0.3300 | 0.0000 | -21.5009 | 3.82E-08 | 5.73E-06 |
| Plag1    | 0.2400 | 0.0000 | -21.5009 | 3.82E-08 | 5.73E-06 |
| Casp8ap2 | 0.2333 | 0.0000 | -21.4987 | 3.83E-08 | 5.73E-06 |
| Tent4b   | 0.3533 | 0.0000 | -21.4987 | 3.83E-08 | 5.73E-06 |
| Adcy6    | 0.2467 | 0.0000 | -21.4928 | 3.86E-08 | 5.73E-06 |
| Mlst8    | 0.4467 | 0.0000 | -21.4928 | 3.86E-08 | 5.73E-06 |
| Slc4a3   | 0.3633 | 0.0000 | -21.4928 | 3.86E-08 | 5.73E-06 |
| Dop1a    | 0.2033 | 0.0000 | -21.4844 | 3.91E-08 | 5.73E-06 |
| Champ1   | 0.3933 | 0.0000 | -21.4821 | 3.93E-08 | 5.73E-06 |
| Pan3     | 0.3767 | 0.0000 | -21.4821 | 3.93E-08 | 5.73E-06 |
| Zfp236   | 0.1467 | 0.0000 | -21.4769 | 3.96E-08 | 5.73E-06 |
| Ill1ra1  | 0.9100 | 0.0000 | -21.4698 | 4.00E-08 | 5.73E-06 |
| Ckap5    | 0.2333 | 0.0000 | -21.4657 | 4.02E-08 | 5.73E-06 |
| Fbxo38   | 0.3633 | 0.0000 | -21.4657 | 4.02E-08 | 5.73E-06 |
| Klhl13   | 0.5633 | 0.0000 | -21.4657 | 4.02E-08 | 5.73E-06 |
| Srpk2    | 0.3833 | 0.0000 | -21.4597 | 4.06E-08 | 5.73E-06 |
| Taf2     | 0.2867 | 0.0000 | -21.4597 | 4.06E-08 | 5.73E-06 |
| Kif1b    | 0.1933 | 0.0000 | -21.4485 | 4.10E-08 | 5.76E-06 |
| Bahcc1   | 0.1400 | 0.0000 | -21.4460 | 4.14E-08 | 5.77E-06 |
| Phldb1   | 0.2633 | 0.0000 | -21.4460 | 4.14E-08 | 5.77E-06 |
| Fez1     | 1.3300 | 0.0000 | -21.3798 | 4.55E-08 | 6.18E-06 |
| Wiz      | 0.3833 | 0.0000 | -21.3737 | 4.56E-08 | 6.19E-06 |
| Ankrd13b | 0.4867 | 0.0000 | -21.3703 | 4.61E-08 | 6.22E-06 |
| Kmt2e    | 0.2067 | 0.0000 | -21.3703 | 4.61E-08 | 6.22E-06 |
| Lemd3    | 0.3633 | 0.0000 | -21.2250 | 5.68E-08 | 7.33E-06 |
| Pfkfb3   | 0.3400 | 0.0000 | -21.2250 | 5.68E-08 | 7.33E-06 |
| Slc37a3  | 0.4000 | 0.0000 | -21.2250 | 5.68E-08 | 7.33E-06 |
| Phf12    | 0.6400 | 0.0000 | -20.9102 | 8.88E-08 | 1.03E-05 |
| Rnf38    | 0.3233 | 0.0000 | -20.9102 | 8.88E-08 | 1.03E-05 |
| Incenp   | 7.9033 | 0.0000 | -11.3431 | 1.40E-08 | 3.95E-06 |
| Nckap5l  | 4.1633 | 0.0000 | -11.0303 | 1.23E-04 | 8.68E-03 |
| Mast3    | 3.4867 | 0.0000 | -10.9476 | 4.01E-18 | 7.19E-14 |
| Gm14308  | 3.7533 | 0.0000 | -10.8375 | 1.09E-17 | 1.47E-13 |
| Arhgap1  | 5.1833 | 0.0000 | -10.6819 | 2.18E-04 | 1.46E-02 |
| Nedd4l   | 1.9067 | 0.0000 | -10.6579 | 2.20E-04 | 1.47E-02 |
| Zfp568   | 1.9733 | 0.0000 | -10.5388 | 2.88E-04 | 1.87E-02 |
| Tcf25    | 5.4200 | 0.0000 | -10.4549 | 3.54E-04 | 2.24E-02 |
| Zfp827   | 1.5567 | 0.0033 | -10.3212 | 3.44E-14 | 1.85E-10 |
| Kat2a    | 3.3967 | 0.0000 | -10.1526 | 7.48E-04 | 4.38E-02 |
| Tcf12    | 2.2167 | 0.0000 | -10.1236 | 5.92E-04 | 3.57E-02 |
| Slc25a44 | 2.8767 | 0.0000 | -10.0866 | 1.04E-14 | 7.55E-11 |
| Pdlim5   | 1.8433 | 0.0000 | -9.9687  | 2.18E-08 | 4.57E-06 |
| Neurl4   | 1.7833 | 0.0000 | -9.9549  | 6.92E-11 | 1.06E-07 |

|           |        |        |         |          |          |
|-----------|--------|--------|---------|----------|----------|
| Tcf4      | 1.2900 | 0.0000 | -9.9480 | 9.93E-13 | 3.82E-09 |
| Dennd2a   | 1.9000 | 0.0000 | -9.8744 | 9.20E-12 | 2.15E-08 |
| Mink1     | 1.6033 | 0.0000 | -9.7543 | 7.02E-10 | 6.20E-07 |
| Pde2a     | 1.9633 | 0.0000 | -9.7481 | 8.80E-11 | 1.19E-07 |
| Las1l     | 3.1467 | 0.0000 | -9.7449 | 1.16E-08 | 3.55E-06 |
| Bcl9l     | 1.2667 | 0.0000 | -9.7159 | 2.55E-11 | 5.08E-08 |
| Rbfox2    | 1.0033 | 0.0000 | -9.5294 | 1.04E-09 | 8.08E-07 |
| Ikzf2     | 0.7333 | 0.0000 | -9.4831 | 1.38E-13 | 6.74E-10 |
| Cbl1l     | 1.7167 | 0.0033 | -9.4815 | 1.29E-12 | 4.49E-09 |
| Huwe1     | 0.4500 | 0.0000 | -9.4809 | 4.26E-09 | 2.19E-06 |
| Exd2      | 2.0933 | 0.0000 | -9.4318 | 1.33E-08 | 3.82E-06 |
| Polr3c    | 2.8133 | 0.0000 | -9.4125 | 2.05E-10 | 2.25E-07 |
| Zdhhc23   | 1.1333 | 0.0000 | -9.3894 | 6.46E-10 | 5.82E-07 |
| Ii17rd    | 0.6933 | 0.0000 | -9.2417 | 3.52E-09 | 2.02E-06 |
| Utrn      | 0.4067 | 0.0000 | -9.0788 | 1.25E-08 | 3.72E-06 |
| Arfgap3   | 1.8767 | 0.0000 | -9.0604 | 1.74E-09 | 1.26E-06 |
| Zfp764    | 1.9800 | 0.0000 | -9.0454 | 8.46E-09 | 3.16E-06 |
| Zfp710    | 1.0133 | 0.0000 | -9.0012 | 8.50E-10 | 7.04E-07 |
| Glr1b     | 1.6033 | 0.0000 | -8.9994 | 2.17E-09 | 1.46E-06 |
| Rnf14     | 1.6100 | 0.0000 | -8.9969 | 3.35E-04 | 2.14E-02 |
| Agpat4    | 2.6133 | 0.0000 | -8.9549 | 8.82E-11 | 1.19E-07 |
| Rbms3     | 0.6067 | 0.0000 | -8.9529 | 2.84E-07 | 2.70E-05 |
| Jph2      | 1.1267 | 0.0000 | -8.9305 | 5.78E-05 | 4.29E-03 |
| Tsc2      | 0.8167 | 0.0000 | -8.9169 | 1.44E-05 | 1.16E-03 |
| Pik3cd    | 0.8967 | 0.0000 | -8.8788 | 2.32E-07 | 2.25E-05 |
| Mtmr1     | 0.8767 | 0.0000 | -8.7310 | 3.25E-10 | 3.36E-07 |
| Proser2   | 1.0467 | 0.0000 | -8.7208 | 6.76E-06 | 5.60E-04 |
| Trrap     | 0.3000 | 0.0000 | -8.7193 | 5.94E-06 | 4.97E-04 |
| Lrif1     | 2.0533 | 0.0000 | -8.6552 | 2.23E-09 | 1.46E-06 |
| Fam120b   | 0.8300 | 0.0000 | -8.6313 | 6.56E-07 | 6.04E-05 |
| Kars      | 1.6533 | 0.0000 | -8.5965 | 3.87E-05 | 2.92E-03 |
| Pi4kb     | 0.9467 | 0.0000 | -8.5844 | 3.32E-07 | 3.14E-05 |
| Map4k2    | 0.7667 | 0.0000 | -8.5333 | 1.93E-04 | 1.32E-02 |
| Dmpk      | 1.2800 | 0.0000 | -8.5008 | 6.36E-07 | 5.87E-05 |
| Csad      | 1.3867 | 0.0000 | -8.4659 | 2.44E-08 | 4.86E-06 |
| Nr4a2     | 0.5033 | 0.0000 | -8.4500 | 4.29E-09 | 2.19E-06 |
| Plekha7   | 0.6633 | 0.0000 | -8.4250 | 4.48E-06 | 3.82E-04 |
| Nrcam     | 0.2800 | 0.0000 | -8.3676 | 7.36E-06 | 6.07E-04 |
| Acy3      | 2.4300 | 0.0000 | -8.3573 | 3.76E-06 | 3.23E-04 |
| Ttk       | 1.0333 | 0.0000 | -8.3231 | 2.18E-07 | 2.12E-05 |
| Tecpr2    | 0.3667 | 0.0000 | -8.2891 | 6.93E-09 | 2.91E-06 |
| Dhcr7     | 1.2233 | 0.0000 | -8.2716 | 1.65E-06 | 1.46E-04 |
| Npep1l    | 1.3533 | 0.0000 | -8.2363 | 7.25E-08 | 8.88E-06 |
| Mib2      | 0.7167 | 0.0000 | -8.2221 | 7.87E-04 | 4.56E-02 |
| Fry       | 0.2633 | 0.0000 | -8.2153 | 5.03E-07 | 4.70E-05 |
| Mea1      | 3.4767 | 0.0000 | -8.2065 | 5.64E-07 | 5.21E-05 |
| Arhgef10l | 0.6033 | 0.0000 | -8.2014 | 4.87E-08 | 6.51E-06 |
| Chst15    | 0.5867 | 0.0000 | -8.1935 | 9.91E-08 | 1.12E-05 |
| Smarcal1  | 0.4967 | 0.0000 | -8.1898 | 5.29E-06 | 4.45E-04 |
| Tmeff1    | 1.0967 | 0.0000 | -8.1829 | 4.02E-08 | 5.73E-06 |
| Lrrc32    | 0.7033 | 0.0000 | -8.1813 | 1.14E-06 | 1.03E-04 |
| Gpatch8   | 0.3733 | 0.0000 | -8.1584 | 2.04E-07 | 1.99E-05 |
| Pcdh17    | 0.2800 | 0.0000 | -8.1317 | 5.71E-06 | 4.80E-04 |
| Cit       | 0.3100 | 0.0000 | -8.1304 | 6.85E-07 | 6.26E-05 |
| Hnrnp1    | 1.6433 | 0.0000 | -8.1085 | 4.26E-08 | 5.88E-06 |
| Zfp14     | 0.7233 | 0.0000 | -8.0763 | 3.00E-06 | 2.58E-04 |
| Gdap2     | 0.7933 | 0.0000 | -7.9697 | 1.09E-07 | 1.19E-05 |
| Tnip1     | 0.8367 | 0.0000 | -7.9436 | 4.17E-07 | 3.91E-05 |
| Washc1    | 1.1700 | 0.0000 | -7.9349 | 5.10E-06 | 4.31E-04 |
| Clpb      | 0.8567 | 0.0033 | -7.9347 | 1.55E-07 | 1.56E-05 |
| Zbtb21    | 0.3867 | 0.0000 | -7.9281 | 1.80E-06 | 1.59E-04 |
| Nacad     | 0.4633 | 0.0000 | -7.9193 | 2.01E-06 | 1.76E-04 |
| Fmn1      | 0.1833 | 0.0000 | -7.8853 | 1.32E-07 | 1.37E-05 |

|               |         |        |         |          |          |
|---------------|---------|--------|---------|----------|----------|
| Eri3          | 1.2867  | 0.0000 | -7.8606 | 1.77E-07 | 1.76E-05 |
| Ikbkb         | 0.5767  | 0.0000 | -7.8387 | 7.71E-04 | 4.50E-02 |
| Zfp966        | 0.6100  | 0.0000 | -7.8351 | 8.84E-07 | 8.04E-05 |
| Arap1         | 0.3400  | 0.0000 | -7.8343 | 5.24E-07 | 4.86E-05 |
| Dzip11        | 0.4033  | 0.0000 | -7.8276 | 8.67E-05 | 6.26E-03 |
| Deaf1         | 0.9233  | 0.0000 | -7.8138 | 1.86E-06 | 1.63E-04 |
| Zfp579        | 0.9967  | 0.0000 | -7.7904 | 4.06E-05 | 3.05E-03 |
| Dab2ip        | 0.3033  | 0.0000 | -7.7231 | 8.04E-05 | 5.83E-03 |
| Timm9         | 2.0400  | 0.0000 | -7.6743 | 5.20E-06 | 4.38E-04 |
| Ift80         | 0.4167  | 0.0000 | -7.6022 | 4.97E-05 | 3.70E-03 |
| Qrich1        | 0.5000  | 0.0000 | -7.5976 | 2.09E-06 | 1.82E-04 |
| Otud5         | 0.4367  | 0.0000 | -7.5928 | 1.65E-04 | 1.14E-02 |
| Klhl25        | 0.6500  | 0.0000 | -7.5238 | 6.56E-06 | 5.47E-04 |
| Smox          | 1.9633  | 0.0133 | -7.5119 | 3.61E-05 | 2.75E-03 |
| Coq8a         | 0.6367  | 0.0000 | -7.4938 | 1.92E-05 | 1.52E-03 |
| Slc38a9       | 0.1867  | 0.0000 | -7.4526 | 1.70E-05 | 1.35E-03 |
| Rgs19         | 0.8800  | 0.0000 | -7.4326 | 1.75E-05 | 1.39E-03 |
| Cwf1911       | 0.3967  | 0.0000 | -7.4263 | 1.25E-04 | 8.83E-03 |
| Scmh1         | 0.1900  | 0.0000 | -7.4154 | 8.37E-05 | 6.06E-03 |
| Mknk1         | 0.6033  | 0.0000 | -7.4025 | 6.57E-06 | 5.47E-04 |
| Man1a         | 0.3233  | 0.0000 | -7.4010 | 3.67E-05 | 2.78E-03 |
| Ndufs8        | 1.5533  | 0.0000 | -7.3750 | 1.06E-04 | 7.57E-03 |
| Cchr1         | 0.5467  | 0.0000 | -7.3509 | 3.45E-05 | 2.63E-03 |
| Plekhj1       | 2.5100  | 0.0167 | -7.3384 | 4.03E-06 | 3.44E-04 |
| Zmynd8        | 0.2833  | 0.0000 | -7.3161 | 1.26E-04 | 8.84E-03 |
| Ubap2l        | 0.3700  | 0.0000 | -7.3055 | 2.08E-04 | 1.41E-02 |
| Gulo          | 0.6533  | 0.0000 | -7.2773 | 1.72E-04 | 1.18E-02 |
| Myo9b         | 0.3767  | 0.0033 | -7.2171 | 9.15E-05 | 6.58E-03 |
| Cpsf7         | 4.9400  | 0.0367 | -7.2136 | 9.74E-08 | 1.11E-05 |
| 3830406C13Rik | 0.5600  | 0.0000 | -7.1929 | 2.09E-05 | 1.64E-03 |
| Accs          | 0.3400  | 0.0000 | -7.1815 | 2.95E-05 | 2.28E-03 |
| Rims2         | 0.2333  | 0.0000 | -7.1745 | 6.95E-04 | 4.11E-02 |
| Pik3cb        | 0.2767  | 0.0000 | -7.1690 | 7.91E-05 | 5.76E-03 |
| Rpp14         | 0.5300  | 0.0000 | -7.1635 | 1.71E-04 | 1.18E-02 |
| Rbm43         | 0.6300  | 0.0033 | -7.1576 | 1.43E-04 | 1.00E-02 |
| Rcor3         | 0.7967  | 0.0000 | -7.1314 | 3.63E-05 | 2.76E-03 |
| Slc9a8        | 0.2933  | 0.0000 | -7.0908 | 4.85E-05 | 3.62E-03 |
| Rps6kc1       | 0.3633  | 0.0000 | -7.0739 | 1.10E-04 | 7.84E-03 |
| Adgrg3        | 0.4900  | 0.0000 | -6.9557 | 1.13E-04 | 8.04E-03 |
| Zfp7          | 0.3867  | 0.0033 | -6.9494 | 1.11E-04 | 7.89E-03 |
| Dock9         | 0.1467  | 0.0000 | -6.9450 | 1.44E-04 | 1.00E-02 |
| Dop1b         | 0.1533  | 0.0000 | -6.8905 | 3.67E-04 | 2.31E-02 |
| Cdk20         | 0.5267  | 0.0000 | -6.8407 | 3.09E-04 | 2.00E-02 |
| Tnks1bp1      | 0.5833  | 0.0100 | -6.7760 | 8.70E-04 | 4.98E-02 |
| Nop2          | 0.3833  | 0.0000 | -6.7482 | 2.30E-04 | 1.52E-02 |
| Nxpe4         | 0.3233  | 0.0000 | -6.7421 | 4.69E-04 | 2.88E-02 |
| Mrpl55        | 0.9500  | 0.0000 | -6.5818 | 5.43E-04 | 3.31E-02 |
| Impdh1        | 0.6067  | 0.0100 | -6.3975 | 2.49E-05 | 1.93E-03 |
| Ncor2         | 0.4767  | 0.0067 | -6.3928 | 2.82E-07 | 2.70E-05 |
| Grik4         | 0.2667  | 0.0067 | -5.6911 | 7.77E-04 | 4.52E-02 |
| Tns1          | 0.1567  | 0.0033 | -5.4949 | 3.26E-04 | 2.10E-02 |
| Mid1          | 0.8300  | 0.0267 | -5.4659 | 5.95E-04 | 3.58E-02 |
| Poll          | 0.6200  | 0.0300 | -4.9393 | 2.29E-04 | 1.52E-02 |
| Rdm1          | 3.7833  | 0.4333 | -3.2597 | 2.59E-07 | 2.49E-05 |
| Grina         | 7.6400  | 0.9567 | -3.0811 | 1.66E-08 | 4.09E-06 |
| Uimc1         | 1.5100  | 0.2333 | -2.8203 | 1.19E-07 | 1.26E-05 |
| Akr1b7        | 1.3467  | 0.2233 | -2.7952 | 1.60E-04 | 1.11E-02 |
| Gm40525       | 10.2100 | 1.6533 | -2.6915 | 7.72E-05 | 5.63E-03 |
| Eef2k         | 1.5100  | 0.2600 | -2.6104 | 6.46E-04 | 3.84E-02 |
| Pde1c         | 2.0700  | 0.3833 | -2.4972 | 4.33E-04 | 2.69E-02 |
| Sh2b3         | 2.2033  | 0.5000 | -2.1940 | 3.73E-10 | 3.73E-07 |
| Atp2c1        | 1.3033  | 0.3467 | -1.9962 | 4.90E-06 | 4.15E-04 |
| Mtf2          | 1.8600  | 0.5033 | -1.9327 | 7.92E-05 | 5.76E-03 |

|           |           |           |         |          |          |
|-----------|-----------|-----------|---------|----------|----------|
| Trip12    | 0.7900    | 0.2200    | -1.9096 | 1.30E-08 | 3.78E-06 |
| Cuedc2    | 13.0100   | 3.7667    | -1.8537 | 4.02E-11 | 7.22E-08 |
| Llg1l     | 1.0033    | 0.3200    | -1.7178 | 5.16E-04 | 3.15E-02 |
| Trp53inp2 | 4.2833    | 1.3833    | -1.7004 | 6.28E-08 | 7.97E-06 |
| Nit1      | 3.7800    | 1.2567    | -1.6753 | 8.56E-04 | 4.91E-02 |
| Wnk4      | 1.1600    | 0.3867    | -1.6667 | 1.35E-04 | 9.41E-03 |
| Ganab     | 0.9233    | 0.3133    | -1.6629 | 2.41E-04 | 1.59E-02 |
| Srrm2     | 1.4800    | 0.5033    | -1.6230 | 3.29E-04 | 2.11E-02 |
| Ddah1     | 2.8367    | 0.9733    | -1.6114 | 1.07E-06 | 9.64E-05 |
| Ndrp2     | 8.6533    | 3.0133    | -1.5894 | 2.49E-11 | 5.08E-08 |
| Gm41885   | 12.7400   | 4.5033    | -1.5616 | 4.69E-06 | 3.99E-04 |
| Bmf       | 2.4533    | 0.8900    | -1.5158 | 7.40E-04 | 4.34E-02 |
| Mcfid2    | 4.8300    | 1.8200    | -1.4702 | 5.23E-07 | 4.86E-05 |
| Asap1     | 4.7733    | 1.8367    | -1.4439 | 3.96E-05 | 2.98E-03 |
| Senp5     | 1.2600    | 0.4900    | -1.4389 | 3.95E-05 | 2.98E-03 |
| Fjx1      | 8.7667    | 3.4367    | -1.4039 | 2.62E-06 | 2.26E-04 |
| Cyth1     | 8.2067    | 3.2600    | -1.3973 | 1.69E-10 | 1.93E-07 |
| Gpr37     | 15.4000   | 6.1767    | -1.3758 | 6.26E-06 | 5.22E-04 |
| Pgap2     | 4.4033    | 1.8367    | -1.3433 | 2.13E-04 | 1.44E-02 |
| Cdk5rap3  | 4.3700    | 1.8267    | -1.3252 | 1.90E-05 | 1.50E-03 |
| Micall2   | 7.2267    | 3.1700    | -1.2574 | 2.80E-04 | 1.83E-02 |
| Plcd1     | 3.3800    | 1.4933    | -1.2408 | 2.40E-04 | 1.59E-02 |
| Amigo1    | 3.1767    | 1.4033    | -1.2382 | 7.56E-05 | 5.53E-03 |
| Ccnj1     | 3.3700    | 1.5033    | -1.2326 | 3.47E-04 | 2.20E-02 |
| Smad2     | 2.3867    | 1.0733    | -1.2096 | 5.37E-04 | 3.28E-02 |
| Zfand2b   | 6.9267    | 3.2333    | -1.1748 | 6.03E-04 | 3.62E-02 |
| Smad3     | 4.8267    | 2.2833    | -1.1527 | 4.38E-04 | 2.71E-02 |
| Tfcp2     | 7.3800    | 3.5533    | -1.1140 | 2.59E-06 | 2.24E-04 |
| Tead3     | 8.7767    | 4.2667    | -1.1037 | 7.35E-04 | 4.32E-02 |
| Tmod1     | 7.7667    | 3.7867    | -1.1007 | 7.84E-04 | 4.56E-02 |
| Camk2n1   | 6.3700    | 3.1033    | -1.0998 | 1.81E-06 | 1.59E-04 |
| Dlg4      | 9.6600    | 4.7500    | -1.0826 | 1.26E-08 | 3.72E-06 |
| Ddah2     | 19.4700   | 9.6367    | -1.0808 | 3.30E-04 | 2.12E-02 |
| Lrp4      | 3.3033    | 1.6333    | -1.0747 | 2.68E-04 | 1.76E-02 |
| Gsn       | 34.9833   | 17.3400   | -1.0746 | 2.36E-04 | 1.56E-02 |
| Iqsec1    | 6.4133    | 3.2067    | -1.0691 | 8.75E-04 | 5.00E-02 |
| Crat      | 12.3733   | 6.2700    | -1.0498 | 2.05E-07 | 1.99E-05 |
| Dbn1      | 10.2067   | 5.1600    | -1.0455 | 6.71E-07 | 6.14E-05 |
| Gm46894   | 82.3033   | 41.7300   | -1.0388 | 2.84E-04 | 1.85E-02 |
| Gpd1      | 42.5433   | 22.0133   | -1.0125 | 7.71E-04 | 4.50E-02 |
| Cttnbp2nl | 13.2967   | 6.9000    | -0.9977 | 1.84E-04 | 1.26E-02 |
| Thra      | 10.4900   | 5.5333    | -0.9852 | 4.20E-05 | 3.15E-03 |
| Eci2      | 20.3633   | 10.9567   | -0.9548 | 3.67E-05 | 2.78E-03 |
| Zdhhc12   | 9.2400    | 5.0267    | -0.9454 | 8.41E-04 | 4.83E-02 |
| Lgi4      | 22.7700   | 12.3400   | -0.9389 | 4.21E-05 | 3.15E-03 |
| Dag1      | 50.7333   | 27.6933   | -0.9353 | 1.51E-04 | 1.05E-02 |
| Nipsnap2  | 39.3100   | 21.6067   | -0.9285 | 2.69E-04 | 1.76E-02 |
| Akt1s1    | 6.1033    | 3.3533    | -0.9285 | 3.95E-04 | 2.47E-02 |
| Tbx2      | 73.7700   | 42.7367   | -0.8549 | 9.83E-06 | 7.99E-04 |
| AU040320  | 6.1333    | 3.5633    | -0.8509 | 3.86E-04 | 2.42E-02 |
| Trim62    | 19.8233   | 11.6600   | -0.8249 | 4.66E-04 | 2.87E-02 |
| Rassf3    | 21.8867   | 12.9333   | -0.8209 | 3.31E-06 | 2.84E-04 |
| Fth1      | 2765.1267 | 1639.5233 | -0.8147 | 1.01E-04 | 7.26E-03 |
| Itpkb     | 8.4067    | 5.0533    | -0.8005 | 1.20E-05 | 9.66E-04 |
| Drosha    | 14.8033   | 9.0000    | -0.7889 | 6.39E-04 | 3.80E-02 |
| Cryab     | 113.0367  | 68.5133   | -0.7838 | 6.17E-04 | 3.69E-02 |
| Trf       | 225.6833  | 136.9833  | -0.7764 | 4.32E-04 | 2.68E-02 |
| Dynl1b    | 43.7400   | 26.6867   | -0.7764 | 5.82E-04 | 3.51E-02 |
| Ttyh3     | 35.4000   | 21.6467   | -0.7737 | 4.84E-07 | 4.53E-05 |
| Bcas3     | 14.2500   | 8.8667    | -0.7486 | 2.22E-06 | 1.94E-04 |
| Src       | 36.5133   | 22.7467   | -0.7454 | 2.14E-04 | 1.44E-02 |
| Zbtb8b    | 11.2433   | 7.0400    | -0.7444 | 1.93E-05 | 1.52E-03 |
| Camkk2    | 12.7233   | 7.9600    | -0.7382 | 1.83E-04 | 1.25E-02 |

|          |          |           |         |          |          |
|----------|----------|-----------|---------|----------|----------|
| Ephb4    | 15.1700  | 9.5333    | -0.7336 | 5.05E-08 | 6.68E-06 |
| Orai1    | 22.7667  | 14.4367   | -0.7220 | 2.71E-04 | 1.77E-02 |
| Rbm3     | 74.1933  | 46.9300   | -0.7175 | 6.41E-05 | 4.73E-03 |
| Pkia     | 3.5867   | 2.2867    | -0.7149 | 1.23E-04 | 8.71E-03 |
| Tmem176b | 62.5633  | 40.0733   | -0.7106 | 2.48E-05 | 1.93E-03 |
| St5      | 16.1633  | 10.3667   | -0.7060 | 3.63E-04 | 2.29E-02 |
| Zfp362   | 37.2900  | 24.4367   | -0.6759 | 7.22E-04 | 4.25E-02 |
| Nfatc2   | 9.5333   | 6.2200    | -0.6751 | 2.79E-05 | 2.16E-03 |
| Dlgap4   | 13.0000  | 8.5367    | -0.6726 | 7.52E-05 | 5.51E-03 |
| Asic1    | 5.7100   | 3.7467    | -0.6704 | 2.59E-05 | 2.01E-03 |
| Cdc42ep1 | 35.0333  | 23.3767   | -0.6404 | 7.26E-05 | 5.33E-03 |
| Man1c1   | 7.2667   | 4.8833    | -0.6353 | 5.79E-04 | 3.50E-02 |
| Tbc1d14  | 5.6967   | 3.8467    | -0.6270 | 6.93E-04 | 4.10E-02 |
| Olfr1033 | 52.7800  | 35.8433   | -0.6216 | 1.10E-05 | 8.95E-04 |
| Mex3a    | 35.5800  | 24.1633   | -0.6188 | 2.57E-04 | 1.69E-02 |
| Mprip    | 13.2700  | 9.0567    | -0.6175 | 2.88E-04 | 1.87E-02 |
| Oaz2     | 51.3433  | 35.0167   | -0.6144 | 2.42E-12 | 6.87E-09 |
| Ehd4     | 29.8000  | 20.3033   | -0.6135 | 6.76E-06 | 5.60E-04 |
| Atp5g3   | 77.4933  | 53.0633   | -0.6100 | 2.88E-04 | 1.87E-02 |
| Inka1    | 54.6233  | 37.5633   | -0.6010 | 2.25E-10 | 2.42E-07 |
| Hpcal1   | 30.4367  | 20.9433   | -0.6008 | 3.79E-05 | 2.87E-03 |
| Ppt2     | 13.6500  | 9.4167    | -0.5945 | 1.21E-04 | 8.56E-03 |
| S1pr2    | 54.2533  | 37.4900   | -0.5894 | 6.95E-05 | 5.10E-03 |
| Emilin1  | 48.3933  | 33.6400   | -0.5840 | 6.79E-05 | 5.00E-03 |
| Arhgef12 | 9.1133   | 6.4300    | -0.5705 | 1.48E-05 | 1.19E-03 |
| Bcl2l1   | 27.6700  | 19.6533   | -0.5531 | 7.71E-05 | 5.63E-03 |
| Acsf2    | 34.9533  | 24.8367   | -0.5515 | 2.16E-04 | 1.45E-02 |
| Man2b1   | 40.2767  | 28.8900   | -0.5411 | 2.08E-05 | 1.63E-03 |
| Ttyh2    | 17.0633  | 12.3033   | -0.5327 | 1.63E-05 | 1.30E-03 |
| H13      | 55.3267  | 40.0800   | -0.5273 | 7.59E-04 | 4.44E-02 |
| Pdk1     | 17.5600  | 12.7100   | -0.5230 | 7.77E-04 | 4.52E-02 |
| Serinc3  | 99.1067  | 72.9233   | -0.5016 | 3.83E-04 | 2.40E-02 |
| Gnas     | 519.9967 | 386.0267  | -0.4910 | 6.89E-05 | 5.07E-03 |
| Pskh1    | 14.7500  | 10.9633   | -0.4910 | 7.92E-04 | 4.59E-02 |
| Marcks11 | 230.0033 | 170.9200  | -0.4896 | 2.08E-05 | 1.63E-03 |
| Clip2    | 19.0200  | 14.1367   | -0.4859 | 3.42E-04 | 2.18E-02 |
| Ext2     | 40.7600  | 30.4733   | -0.4853 | 2.96E-05 | 2.28E-03 |
| Hexim1   | 30.2267  | 22.6400   | -0.4794 | 2.27E-06 | 1.97E-04 |
| Pxn      | 23.3233  | 17.4933   | -0.4792 | 2.12E-04 | 1.43E-02 |
| Ppp2r5c  | 16.8267  | 12.7633   | -0.4629 | 3.75E-04 | 2.36E-02 |
| Gna12    | 27.1967  | 20.7700   | -0.4546 | 6.46E-04 | 3.84E-02 |
| Penx     | 4.1067   | 3.1300    | -0.4520 | 2.28E-04 | 1.52E-02 |
| Gnai2    | 310.7233 | 251.5600  | -0.3659 | 3.11E-05 | 2.39E-03 |
| Dync1i2  | 34.2867  | 27.8233   | -0.3621 | 9.32E-06 | 7.59E-04 |
| Ctdsp2   | 36.5500  | 30.2833   | -0.3342 | 1.40E-04 | 9.79E-03 |
| Mcm3     | 73.3200  | 88.0333   | 0.2011  | 5.51E-04 | 3.35E-02 |
| Hnrnpa1  | 340.0133 | 407.7733  | 0.2021  | 4.55E-04 | 2.81E-02 |
| Mcm2     | 70.2367  | 89.6233   | 0.2902  | 3.99E-04 | 2.49E-02 |
| Ddx21    | 51.3767  | 66.0200   | 0.2972  | 6.45E-04 | 3.84E-02 |
| Gtpbp4   | 19.0767  | 24.7200   | 0.3126  | 8.36E-04 | 4.81E-02 |
| Nap1l1   | 171.0000 | 222.0767  | 0.3142  | 1.35E-05 | 1.08E-03 |
| Rpl26    | 813.3733 | 1065.3233 | 0.3299  | 4.04E-04 | 2.52E-02 |
| Ddx39    | 49.6633  | 65.9433   | 0.3467  | 1.09E-04 | 7.77E-03 |
| Wdr75    | 30.1967  | 41.1633   | 0.3843  | 2.24E-04 | 1.49E-02 |
| Ewsr1    | 75.2867  | 103.0500  | 0.3931  | 1.42E-08 | 3.95E-06 |
| Srsf2    | 45.6167  | 62.5267   | 0.3951  | 8.10E-04 | 4.68E-02 |
| Rbm28    | 20.6300  | 28.4700   | 0.4044  | 8.30E-04 | 4.78E-02 |
| Azi2     | 11.7500  | 16.3067   | 0.4135  | 1.34E-04 | 9.38E-03 |
| Luc7l2   | 15.3300  | 21.8067   | 0.4480  | 1.27E-07 | 1.34E-05 |
| Prc1     | 16.7067  | 24.2367   | 0.4778  | 2.16E-04 | 1.45E-02 |
| Gls      | 17.9600  | 26.5367   | 0.5058  | 3.53E-04 | 2.23E-02 |
| Hsp90b1  | 396.6000 | 593.3667  | 0.5202  | 2.04E-04 | 1.38E-02 |
| Khdc4    | 5.3500   | 8.0733    | 0.5326  | 6.61E-04 | 3.91E-02 |



|          |          |          |        |          |          |
|----------|----------|----------|--------|----------|----------|
| Syne1    | 14.6367  | 22.0933  | 0.5353 | 8.40E-04 | 4.82E-02 |
| Cdk11b   | 16.5800  | 25.1600  | 0.5386 | 8.10E-06 | 6.62E-04 |
| Hsp90aa1 | 510.3933 | 824.4733 | 0.6330 | 2.90E-12 | 7.80E-09 |
| Dot1l    | 3.4100   | 5.5233   | 0.6365 | 1.07E-05 | 8.67E-04 |
| Nudcd1   | 5.5367   | 9.0267   | 0.6454 | 3.26E-07 | 3.09E-05 |
| Fam45a   | 4.6700   | 7.7200   | 0.6664 | 6.36E-04 | 3.79E-02 |
| Ppa1     | 41.1000  | 69.1033  | 0.6850 | 2.64E-04 | 1.73E-02 |
| Slc5a3   | 1.6867   | 2.8567   | 0.6973 | 4.58E-04 | 2.82E-02 |
| Terf1    | 7.4600   | 12.7600  | 0.7139 | 1.75E-04 | 1.20E-02 |
| Wars     | 21.5367  | 39.1600  | 0.8100 | 1.84E-04 | 1.26E-02 |
| Slc39a7  | 14.7600  | 27.5000  | 0.8426 | 2.10E-04 | 1.42E-02 |
| Camk2g   | 3.5533   | 6.7367   | 0.8544 | 3.51E-04 | 2.23E-02 |
| Xrcc6    | 8.2200   | 15.6567  | 0.8713 | 3.63E-04 | 2.29E-02 |
| Bub1     | 5.3167   | 10.4800  | 0.9221 | 2.90E-08 | 5.23E-06 |
| Ldha     | 2.5267   | 5.4500   | 1.0460 | 2.72E-04 | 1.77E-02 |
| Atp11a   | 1.1133   | 2.4800   | 1.0937 | 2.99E-06 | 2.58E-04 |
| Rptor    | 1.4300   | 3.2500   | 1.1270 | 4.57E-06 | 3.89E-04 |
| Rce1     | 3.8000   | 8.7733   | 1.1427 | 1.55E-04 | 1.08E-02 |
| Nop58    | 5.6033   | 13.1433  | 1.1754 | 5.40E-04 | 3.29E-02 |
| Fos      | 11.1267  | 26.3933  | 1.1809 | 4.15E-04 | 2.59E-02 |
| Ints3    | 1.5333   | 3.6967   | 1.2127 | 1.56E-06 | 1.38E-04 |
| Smc6     | 0.8333   | 2.0567   | 1.2649 | 3.46E-04 | 2.20E-02 |
| Tubgcp4  | 4.3467   | 10.9300  | 1.2773 | 2.18E-08 | 4.57E-06 |
| Depdc1a  | 1.3167   | 3.3700   | 1.2997 | 1.90E-04 | 1.30E-02 |
| Nckipsd  | 0.8933   | 2.3433   | 1.3364 | 3.38E-04 | 2.15E-02 |
| Nexn     | 1.5400   | 4.1033   | 1.3563 | 3.56E-04 | 2.25E-02 |
| Lig1     | 0.7800   | 2.1033   | 1.3788 | 1.19E-04 | 8.41E-03 |
| Nsd3     | 0.6667   | 1.8267   | 1.3945 | 4.36E-04 | 2.70E-02 |
| Nod1     | 0.7033   | 2.1433   | 1.5281 | 5.60E-04 | 3.40E-02 |
| Gemin5   | 1.7867   | 5.5700   | 1.5735 | 4.18E-05 | 3.14E-03 |
| Rad51ap1 | 1.4033   | 4.6767   | 1.6747 | 9.91E-05 | 7.12E-03 |
| Clk4     | 2.5133   | 8.3700   | 1.6790 | 1.69E-05 | 1.35E-03 |
| Zup1     | 1.1933   | 4.1800   | 1.7534 | 6.43E-08 | 8.14E-06 |
| Morc3    | 1.3233   | 4.7033   | 1.7683 | 2.35E-04 | 1.56E-02 |
| Plekhg1  | 0.4267   | 1.5400   | 1.7729 | 1.17E-04 | 8.26E-03 |
| Flnb     | 0.5367   | 1.9767   | 1.8227 | 8.97E-05 | 6.47E-03 |
| Egr2     | 0.4567   | 1.8133   | 1.9343 | 1.17E-06 | 1.06E-04 |
| Pkd1     | 0.1200   | 0.4933   | 1.9664 | 2.29E-04 | 1.52E-02 |
| Tut7     | 1.1267   | 4.9900   | 2.1006 | 9.31E-10 | 7.59E-07 |
| Tbl1xr1  | 0.2767   | 1.5467   | 2.4424 | 1.13E-04 | 8.02E-03 |
| Dnm2     | 0.1867   | 1.1367   | 2.5716 | 3.75E-05 | 2.84E-03 |
| Ktn1     | 0.1300   | 0.8933   | 2.7938 | 1.27E-04 | 8.91E-03 |
| Unc13d   | 0.0200   | 0.6567   | 5.0799 | 6.20E-04 | 3.71E-02 |
| Cyld     | 0.0333   | 1.1367   | 5.1811 | 1.07E-04 | 7.64E-03 |
| Rsrc2    | 0.0767   | 2.4900   | 5.2137 | 3.44E-05 | 2.63E-03 |
| Prrc2c   | 0.1533   | 6.2000   | 5.2779 | 3.74E-26 | 2.01E-21 |
| Nr2c2ap  | 0.0667   | 2.2867   | 5.3371 | 1.19E-06 | 1.07E-04 |
| Zmynd15  | 0.0200   | 0.6500   | 5.7568 | 4.53E-04 | 2.80E-02 |
| Tmem87b  | 0.0600   | 3.3400   | 5.7800 | 2.87E-04 | 1.87E-02 |
| Wdr26    | 0.0400   | 2.4367   | 6.0154 | 1.08E-04 | 7.74E-03 |
| Mapkapk3 | 0.0000   | 0.3633   | 6.3986 | 7.54E-04 | 4.41E-02 |
| Plekhg5  | 0.0333   | 2.6433   | 6.4065 | 1.24E-05 | 1.00E-03 |
| Zranb2   | 0.0000   | 0.3233   | 6.4584 | 7.29E-04 | 4.29E-02 |
| Bicd1    | 0.0100   | 0.9500   | 6.4879 | 3.95E-07 | 3.71E-05 |
| Acp5     | 0.0000   | 0.7167   | 6.5057 | 7.38E-04 | 4.33E-02 |
| Sigmar1  | 0.0000   | 0.6733   | 6.5063 | 4.70E-04 | 2.88E-02 |
| Brd9     | 0.0100   | 0.9267   | 6.5299 | 2.15E-05 | 1.68E-03 |
| Gnb5     | 0.0000   | 0.4633   | 6.5620 | 4.22E-04 | 2.63E-02 |
| Mettl6   | 0.0000   | 1.1700   | 6.5917 | 8.08E-04 | 4.67E-02 |
| Ppp4r3a  | 0.0233   | 2.3533   | 6.5920 | 1.52E-05 | 1.22E-03 |
| Mon2     | 0.0000   | 0.1800   | 6.6576 | 8.08E-04 | 4.67E-02 |
| Magi1    | 0.0000   | 0.1533   | 6.6614 | 4.20E-04 | 2.62E-02 |
| Crocc    | 0.0000   | 0.1600   | 6.6746 | 3.29E-04 | 2.11E-02 |

|          |        |        |        |          |          |
|----------|--------|--------|--------|----------|----------|
| Lrrc49   | 0.0000 | 0.3567 | 6.7348 | 4.22E-04 | 2.63E-02 |
| Adamts10 | 0.0000 | 0.2933 | 6.7405 | 5.65E-04 | 3.43E-02 |
| Trak1    | 0.0067 | 0.4467 | 6.7597 | 4.81E-04 | 2.95E-02 |
| Galk2    | 0.0000 | 0.6167 | 6.7695 | 1.65E-04 | 1.14E-02 |
| Rhpn1    | 0.0000 | 0.5533 | 6.7956 | 2.05E-04 | 1.39E-02 |
| Tex9     | 0.0000 | 0.6433 | 6.8056 | 3.11E-04 | 2.01E-02 |
| Ptpre    | 0.0000 | 0.2400 | 6.8494 | 2.18E-04 | 1.46E-02 |
| Dyrk1a   | 0.0067 | 0.7833 | 6.8521 | 1.80E-08 | 4.27E-06 |
| D2hgdh   | 0.0000 | 0.2733 | 6.9410 | 3.67E-04 | 2.31E-02 |
| Dlx1     | 0.0000 | 0.3667 | 6.9554 | 6.06E-05 | 4.48E-03 |
| Glrx     | 0.0000 | 1.0533 | 6.9740 | 4.18E-05 | 3.14E-03 |
| Sirt3    | 0.0000 | 1.1467 | 6.9914 | 2.03E-04 | 1.38E-02 |
| Rarres2  | 0.0000 | 1.9100 | 7.0173 | 6.16E-04 | 3.69E-02 |
| Zfp473   | 0.0000 | 0.3733 | 7.0321 | 3.28E-04 | 2.11E-02 |
| Recql4   | 0.0000 | 0.3433 | 7.0422 | 5.85E-05 | 4.34E-03 |
| Hgs      | 0.0000 | 0.4933 | 7.0723 | 6.67E-05 | 4.92E-03 |
| Plekha5  | 0.0000 | 0.3067 | 7.0939 | 3.11E-04 | 2.00E-02 |
| Fars2    | 0.0000 | 1.3800 | 7.0948 | 1.66E-04 | 1.15E-02 |
| Rasa13   | 0.0000 | 0.4233 | 7.1069 | 6.56E-04 | 3.89E-02 |
| Art3     | 0.0000 | 1.0433 | 7.1240 | 3.37E-04 | 2.15E-02 |
| Nhs11    | 0.0000 | 0.2067 | 7.1321 | 1.95E-04 | 1.33E-02 |
| Pdss1    | 0.0000 | 0.9033 | 7.1517 | 8.37E-05 | 6.06E-03 |
| Htra3    | 0.0000 | 0.5667 | 7.1544 | 8.27E-04 | 4.77E-02 |
| Ahdc1    | 0.0000 | 0.2267 | 7.1849 | 1.12E-05 | 9.03E-04 |
| Ablim1   | 0.0000 | 0.2467 | 7.2044 | 8.03E-05 | 5.83E-03 |
| Rnmt     | 0.0000 | 0.7500 | 7.2139 | 2.53E-05 | 1.96E-03 |
| Zfp558   | 0.0000 | 0.4233 | 7.2320 | 1.87E-05 | 1.48E-03 |
| Prpf3    | 0.0000 | 0.4700 | 7.2545 | 3.11E-05 | 2.39E-03 |
| Zfyve21  | 0.0000 | 1.3033 | 7.2666 | 7.37E-06 | 6.07E-04 |
| Stil     | 0.0000 | 0.3133 | 7.2821 | 7.95E-06 | 6.51E-04 |
| Rcsd1    | 0.0067 | 1.2833 | 7.2846 | 5.02E-07 | 4.69E-05 |
| Dennd2c  | 0.0000 | 0.4667 | 7.2961 | 6.28E-04 | 3.75E-02 |
| Fanc1    | 0.0000 | 1.1233 | 7.3330 | 2.15E-05 | 1.68E-03 |
| Sh2d2a   | 0.0000 | 0.4033 | 7.4476 | 1.89E-05 | 1.50E-03 |
| Mdfi     | 0.0000 | 2.0667 | 7.4609 | 2.48E-05 | 1.93E-03 |
| Afmid    | 0.0000 | 0.8733 | 7.5000 | 7.36E-06 | 6.07E-04 |
| Hsf4     | 0.0000 | 1.2100 | 7.5006 | 8.52E-05 | 6.16E-03 |
| Sox5     | 0.0000 | 0.2500 | 7.5100 | 6.02E-04 | 3.61E-02 |
| Bnc2     | 0.0000 | 0.1500 | 7.5425 | 6.63E-06 | 5.50E-04 |
| Relb     | 0.0167 | 1.9600 | 7.5682 | 5.73E-04 | 3.47E-02 |
| Cep63    | 0.0000 | 0.4833 | 7.5730 | 5.43E-05 | 4.04E-03 |
| Baz2b    | 0.0000 | 0.2700 | 7.6650 | 5.15E-04 | 3.15E-02 |
| Irf7     | 0.0000 | 1.2800 | 7.6755 | 5.13E-06 | 4.33E-04 |
| Kirrel   | 0.0000 | 0.3067 | 7.7795 | 2.44E-07 | 2.36E-05 |
| Pecam1   | 0.0000 | 0.7067 | 7.7925 | 7.46E-06 | 6.13E-04 |
| Plekho2  | 0.0000 | 0.7400 | 7.7992 | 1.52E-06 | 1.35E-04 |
| Ip6k2    | 0.0000 | 1.3400 | 7.8057 | 1.44E-06 | 1.28E-04 |
| Nipa2    | 0.0000 | 0.9133 | 7.8072 | 2.60E-04 | 1.71E-02 |
| Mbnl3    | 0.0000 | 0.2933 | 7.8517 | 3.15E-05 | 2.41E-03 |
| Cramp11  | 0.0000 | 0.3367 | 7.9270 | 1.34E-05 | 1.08E-03 |
| Hmga1    | 0.0000 | 1.5867 | 7.9409 | 5.10E-07 | 4.75E-05 |
| Wdr25    | 0.0000 | 0.9867 | 7.9506 | 1.32E-06 | 1.18E-04 |
| Usp9x    | 0.0000 | 0.2967 | 7.9727 | 1.39E-07 | 1.43E-05 |
| Zbtb37   | 0.0000 | 0.7067 | 8.0242 | 4.96E-08 | 6.59E-06 |
| Med25    | 0.0000 | 0.7200 | 8.0267 | 1.77E-07 | 1.76E-05 |
| Hccs     | 0.0000 | 1.2467 | 8.0594 | 1.69E-07 | 1.70E-05 |
| Zfp967   | 0.0000 | 0.8233 | 8.0824 | 9.85E-07 | 8.95E-05 |
| C2cd3    | 0.0000 | 0.4100 | 8.1073 | 6.82E-06 | 5.64E-04 |
| Tuft1    | 0.0000 | 1.1967 | 8.1339 | 7.16E-08 | 8.81E-06 |
| Gfod2    | 0.0000 | 0.6900 | 8.1381 | 8.35E-06 | 6.81E-04 |
| Pla2g4c  | 0.0000 | 0.9100 | 8.1442 | 5.37E-07 | 4.97E-05 |
| Rtkn     | 0.0000 | 1.6200 | 8.1446 | 1.61E-07 | 1.62E-05 |
| Ciita    | 0.0000 | 0.5800 | 8.1821 | 1.77E-06 | 1.56E-04 |

|         |        |        |         |          |          |
|---------|--------|--------|---------|----------|----------|
| Rxylt1  | 0.0000 | 0.9400 | 8.1896  | 3.15E-06 | 2.71E-04 |
| Fanci   | 0.0000 | 0.6867 | 8.2035  | 2.18E-07 | 2.12E-05 |
| Nagk    | 0.0000 | 2.7233 | 8.2093  | 2.23E-05 | 1.74E-03 |
| Erg     | 0.0000 | 1.0667 | 8.3159  | 5.74E-06 | 4.80E-04 |
| Tfpi    | 0.0000 | 2.3600 | 8.3447  | 3.52E-07 | 3.32E-05 |
| Ptprg   | 0.0000 | 0.5667 | 8.3734  | 2.26E-06 | 1.97E-04 |
| Zfp37   | 0.0000 | 1.0267 | 8.3796  | 1.92E-09 | 1.36E-06 |
| Pla1a   | 0.0000 | 2.0600 | 8.4142  | 1.87E-07 | 1.85E-05 |
| Trim59  | 0.0000 | 1.2667 | 8.4343  | 1.61E-08 | 4.09E-06 |
| Lima1   | 0.0000 | 0.8800 | 8.4485  | 4.34E-09 | 2.19E-06 |
| Bbs4    | 0.0000 | 1.6533 | 8.4792  | 8.90E-08 | 1.03E-05 |
| Ilf3    | 0.0000 | 1.1467 | 8.4799  | 5.07E-10 | 4.87E-07 |
| Cln7    | 0.0000 | 0.9800 | 8.4923  | 5.39E-10 | 5.09E-07 |
| Cdc14a  | 0.0000 | 0.9133 | 8.5294  | 4.96E-09 | 2.28E-06 |
| Kdm4b   | 0.0000 | 0.7600 | 8.5811  | 3.18E-05 | 2.44E-03 |
| Gigyf1  | 0.0000 | 0.6567 | 8.6133  | 1.26E-06 | 1.13E-04 |
| Agfg1   | 0.0067 | 1.9900 | 8.6463  | 9.54E-11 | 1.25E-07 |
| Kmt2c   | 0.0000 | 0.2567 | 8.6533  | 2.75E-07 | 2.64E-05 |
| Kdm2b   | 0.0000 | 0.8767 | 8.6797  | 8.63E-11 | 1.19E-07 |
| Homer1  | 0.0000 | 0.9300 | 8.6964  | 7.96E-11 | 1.16E-07 |
| Bcl2l13 | 0.0000 | 0.7000 | 8.7923  | 1.52E-07 | 1.53E-05 |
| Esr1    | 0.0000 | 0.7967 | 8.8503  | 9.98E-10 | 7.90E-07 |
| Srr     | 0.0000 | 1.3533 | 8.8560  | 3.65E-07 | 3.44E-05 |
| Gtf2i   | 0.0000 | 1.0200 | 8.8672  | 2.08E-06 | 1.82E-04 |
| Tex2    | 0.0000 | 1.1067 | 8.9542  | 8.06E-10 | 6.78E-07 |
| Zc3hav1 | 0.0000 | 0.8700 | 8.9831  | 1.01E-07 | 1.13E-05 |
| Sp100   | 0.0000 | 2.4767 | 9.2122  | 1.56E-12 | 4.94E-09 |
| Mtif2   | 0.0000 | 2.3900 | 9.2819  | 7.82E-13 | 3.24E-09 |
| St6gal1 | 0.0000 | 1.7033 | 9.2948  | 8.04E-10 | 6.78E-07 |
| Ccnl1   | 0.0000 | 1.8200 | 9.3159  | 1.68E-12 | 5.02E-09 |
| Whrn    | 0.0000 | 1.6533 | 9.3221  | 1.33E-12 | 4.49E-09 |
| Cables2 | 0.0000 | 2.4567 | 9.3627  | 4.40E-10 | 4.30E-07 |
| Slc11a2 | 0.0000 | 1.7233 | 9.4093  | 1.71E-11 | 3.68E-08 |
| Ncapg2  | 0.0000 | 1.1300 | 9.4354  | 1.20E-11 | 2.68E-08 |
| Tcf20   | 0.0000 | 1.0267 | 9.4405  | 7.29E-11 | 1.09E-07 |
| Mtx3    | 0.0000 | 1.1733 | 9.4439  | 6.70E-07 | 6.14E-05 |
| Fubp1   | 0.0000 | 1.2633 | 9.4744  | 1.74E-10 | 1.95E-07 |
| Morc4   | 0.0000 | 1.9900 | 9.5329  | 1.79E-08 | 4.27E-06 |
| Bclaf1  | 0.0067 | 5.2900 | 9.5469  | 1.52E-04 | 1.06E-02 |
| Gbbp1   | 0.0000 | 2.3433 | 9.6340  | 1.41E-10 | 1.72E-07 |
| Fkrp    | 0.0067 | 6.0933 | 9.6348  | 5.13E-05 | 3.82E-03 |
| Cd2ap   | 0.0000 | 1.8667 | 9.6898  | 7.13E-12 | 1.74E-08 |
| Limch1  | 0.0000 | 1.5767 | 9.7641  | 1.64E-10 | 1.92E-07 |
| Akap8   | 0.0000 | 2.6900 | 9.7943  | 6.14E-11 | 9.72E-08 |
| Ak4     | 0.0000 | 2.1833 | 9.9594  | 2.28E-13 | 1.02E-09 |
| Plekhm3 | 0.0000 | 1.2933 | 10.0257 | 7.10E-04 | 4.19E-02 |
| Rtn4rl2 | 0.0000 | 5.8733 | 10.0469 | 7.18E-04 | 4.23E-02 |
| Ldlr    | 0.0000 | 2.7900 | 10.2108 | 1.12E-14 | 7.55E-11 |
| Prpf40a | 0.0000 | 1.8867 | 10.2923 | 4.94E-04 | 3.02E-02 |
| Usp45   | 0.0000 | 2.7767 | 10.6268 | 2.29E-04 | 1.52E-02 |
| Son     | 0.0000 | 1.5533 | 10.7420 | 2.44E-09 | 1.57E-06 |
| Trim26  | 0.0000 | 6.2800 | 10.8542 | 4.87E-16 | 5.25E-12 |
| Ifi203  | 0.0000 | 5.1333 | 11.1887 | 4.68E-19 | 1.26E-14 |
| Mtfr1   | 0.0000 | 9.7000 | 11.3362 | 1.09E-07 | 1.19E-05 |
| Asb8    | 0.0000 | 0.8333 | 18.9039 | 1.33E-06 | 1.18E-04 |
| Gramd3  | 0.0000 | 0.7233 | 18.9039 | 1.33E-06 | 1.18E-04 |
| Hdac4   | 0.0000 | 0.2100 | 18.9101 | 1.32E-06 | 1.18E-04 |
| Smg9    | 0.0000 | 0.8300 | 18.9101 | 1.32E-06 | 1.18E-04 |
| Ube3a   | 0.0000 | 0.4400 | 19.4374 | 6.60E-07 | 6.07E-05 |
| Slf2    | 0.0000 | 0.2300 | 19.4481 | 6.54E-07 | 6.03E-05 |
| Mitf    | 0.0000 | 0.4367 | 19.8902 | 3.62E-07 | 3.41E-05 |
| Mid2    | 0.0000 | 0.3300 | 20.0086 | 3.08E-07 | 2.92E-05 |
| Fgfr1   | 0.0000 | 0.7633 | 20.0667 | 2.83E-07 | 2.70E-05 |

|          |        |        |         |          |          |
|----------|--------|--------|---------|----------|----------|
| Dclk2    | 0.0000 | 0.5033 | 20.1712 | 2.47E-07 | 2.38E-05 |
| Obsl1    | 0.0000 | 0.3267 | 20.1712 | 2.47E-07 | 2.38E-05 |
| Stk39    | 0.0000 | 0.8300 | 20.3338 | 1.97E-07 | 1.92E-05 |
| Tanc2    | 0.0000 | 0.2067 | 20.3435 | 1.94E-07 | 1.91E-05 |
| Nfe2l1   | 0.0000 | 0.6700 | 20.3473 | 1.93E-07 | 1.90E-05 |
| Nucb1    | 0.0000 | 0.9033 | 20.3501 | 1.93E-07 | 1.90E-05 |
| Acvr2b   | 0.0000 | 0.2267 | 20.3516 | 1.92E-07 | 1.89E-05 |
| Sfmbt1   | 0.0000 | 0.3067 | 20.3548 | 1.91E-07 | 1.89E-05 |
| Zbtb46   | 0.0000 | 0.4467 | 20.3575 | 1.91E-07 | 1.89E-05 |
| Mtmr12   | 0.0033 | 0.5633 | 20.3871 | 1.83E-07 | 1.82E-05 |
| Pxdn     | 0.0000 | 0.3700 | 20.4166 | 1.76E-07 | 1.75E-05 |
| Ndr3     | 0.0000 | 0.6500 | 20.5365 | 1.50E-07 | 1.51E-05 |
| Slc27a1  | 0.0000 | 0.4767 | 20.5589 | 1.45E-07 | 1.47E-05 |
| Fam126b  | 0.0000 | 0.1833 | 20.5645 | 1.44E-07 | 1.47E-05 |
| Slc40a1  | 0.0000 | 0.4867 | 20.5710 | 1.43E-07 | 1.46E-05 |
| Hip1r    | 0.0000 | 0.3767 | 20.5965 | 1.38E-07 | 1.42E-05 |
| Vps39    | 0.0000 | 0.3767 | 20.5965 | 1.38E-07 | 1.42E-05 |
| Appl1    | 0.0000 | 0.2367 | 20.6058 | 1.36E-07 | 1.40E-05 |
| Aebp2    | 0.0000 | 0.3267 | 20.6252 | 1.32E-07 | 1.37E-05 |
| Rnf111   | 0.0000 | 0.4033 | 20.6252 | 1.32E-07 | 1.37E-05 |
| Wdr73    | 0.0033 | 0.6867 | 20.6252 | 1.32E-07 | 1.37E-05 |
| Zbtb4    | 0.0000 | 0.2867 | 20.6361 | 1.30E-07 | 1.36E-05 |
| Rbms1    | 0.0000 | 0.3667 | 20.6508 | 1.28E-07 | 1.34E-05 |
| Zfp518a  | 0.0000 | 0.2500 | 20.6617 | 1.26E-07 | 1.32E-05 |
| Fam214a  | 0.0033 | 0.4033 | 20.6698 | 1.24E-07 | 1.31E-05 |
| Adgr1    | 0.0000 | 0.2467 | 20.6840 | 1.22E-07 | 1.29E-05 |
| Atxn1    | 0.0000 | 0.2233 | 20.7041 | 1.18E-07 | 1.26E-05 |
| Larp4b   | 0.0000 | 0.2767 | 20.7041 | 1.18E-07 | 1.26E-05 |
| Pigb     | 0.0000 | 0.7567 | 20.7060 | 1.18E-07 | 1.26E-05 |
| Apb2     | 0.0000 | 0.2700 | 20.7180 | 1.16E-07 | 1.25E-05 |
| Mapk8ip3 | 0.0000 | 0.3233 | 20.7201 | 1.16E-07 | 1.24E-05 |
| Cytip    | 0.0000 | 0.7367 | 20.7340 | 1.14E-07 | 1.22E-05 |
| Fgf1     | 0.0000 | 0.4600 | 20.7340 | 1.14E-07 | 1.22E-05 |
| Mtmr14   | 0.0000 | 0.8033 | 20.7469 | 1.11E-07 | 1.21E-05 |
| Lrp8     | 0.0000 | 0.2367 | 20.7478 | 1.11E-07 | 1.21E-05 |
| Nsmf     | 0.0000 | 0.6367 | 20.7478 | 1.11E-07 | 1.21E-05 |
| Hook3    | 0.0000 | 0.1400 | 20.7531 | 1.10E-07 | 1.20E-05 |
| Milt1    | 0.0000 | 1.0500 | 20.7568 | 1.10E-07 | 1.20E-05 |
| Abcc5    | 0.0000 | 0.1700 | 20.7611 | 1.09E-07 | 1.20E-05 |
| Cplane1  | 0.0000 | 0.1967 | 20.7664 | 1.08E-07 | 1.19E-05 |
| Shkbp1   | 0.0000 | 0.7967 | 20.7906 | 1.05E-07 | 1.16E-05 |
| Epb41    | 0.0000 | 0.3233 | 20.7990 | 1.04E-07 | 1.15E-05 |
| Pcx      | 0.0000 | 0.4567 | 20.7992 | 1.04E-07 | 1.15E-05 |
| Pik3cg   | 0.0000 | 0.2867 | 20.8027 | 1.03E-07 | 1.15E-05 |
| Armc7    | 0.0000 | 0.8967 | 20.8140 | 1.01E-07 | 1.13E-05 |
| Mbnl1    | 0.0000 | 0.4700 | 20.8144 | 1.01E-07 | 1.13E-05 |
| Resf1    | 0.0000 | 0.2933 | 20.8144 | 1.01E-07 | 1.13E-05 |
| Mier1    | 0.0000 | 0.3900 | 20.8287 | 9.93E-08 | 1.12E-05 |
| Mindy2   | 0.0000 | 0.2267 | 20.8287 | 9.93E-08 | 1.12E-05 |
| Zfp46    | 0.0000 | 0.3967 | 20.8313 | 9.89E-08 | 1.12E-05 |
| Rasgrp4  | 0.0000 | 0.4167 | 20.8394 | 9.78E-08 | 1.11E-05 |
| Srsf11   | 0.0000 | 0.6133 | 20.8520 | 9.60E-08 | 1.10E-05 |
| Jag2     | 0.0000 | 0.4800 | 20.8703 | 9.33E-08 | 1.07E-05 |
| Wdr7     | 0.0000 | 0.3200 | 20.8703 | 9.33E-08 | 1.07E-05 |
| Osbpl9   | 0.0000 | 0.7967 | 20.8904 | 9.09E-08 | 1.05E-05 |
| Bcas1    | 0.0000 | 0.7433 | 20.9006 | 8.96E-08 | 1.03E-05 |
| Pted3    | 0.0033 | 0.7600 | 20.9023 | 8.94E-08 | 1.03E-05 |
| Rad18    | 0.0000 | 0.8000 | 20.9182 | 8.74E-08 | 1.02E-05 |
| Smarca2  | 0.0000 | 1.0400 | 20.9186 | 8.73E-08 | 1.02E-05 |
| Ankrd12  | 0.0000 | 0.1833 | 20.9215 | 8.70E-08 | 1.02E-05 |
| Ndst1    | 0.0000 | 0.2600 | 20.9218 | 8.69E-08 | 1.02E-05 |
| Wdhd1    | 0.0000 | 0.5133 | 20.9252 | 8.65E-08 | 1.02E-05 |
| Gm1966   | 0.0000 | 0.2367 | 20.9300 | 8.59E-08 | 1.02E-05 |

|               |        |        |         |          |          |
|---------------|--------|--------|---------|----------|----------|
| Elmod3        | 0.0000 | 0.9333 | 20.9444 | 8.42E-08 | 9.98E-06 |
| Rbm27         | 0.0000 | 0.3300 | 20.9444 | 8.42E-08 | 9.98E-06 |
| Mical3        | 0.0000 | 0.4433 | 20.9613 | 8.15E-08 | 9.74E-06 |
| Akt3          | 0.0000 | 0.3467 | 20.9660 | 8.14E-08 | 9.74E-06 |
| Zc3h18        | 0.0000 | 0.4800 | 20.9716 | 8.10E-08 | 9.73E-06 |
| Ttc37         | 0.0000 | 0.3400 | 20.9883 | 7.91E-08 | 9.52E-06 |
| Klc1          | 0.0000 | 0.9600 | 20.9895 | 7.89E-08 | 9.52E-06 |
| Enpp4         | 0.0000 | 0.4967 | 21.0111 | 7.65E-08 | 9.26E-06 |
| Zfp644        | 0.0000 | 0.3833 | 21.0258 | 7.49E-08 | 9.08E-06 |
| Fmnl3         | 0.0000 | 0.4933 | 21.0263 | 7.49E-08 | 9.08E-06 |
| Fbxo34        | 0.0000 | 0.8133 | 21.0518 | 7.21E-08 | 8.84E-06 |
| Pnizr         | 0.0000 | 0.5367 | 21.0690 | 7.04E-08 | 8.68E-06 |
| Spred3        | 0.0000 | 1.6267 | 21.0727 | 6.93E-08 | 8.59E-06 |
| Zfp868        | 0.0000 | 0.9133 | 21.0792 | 6.94E-08 | 8.59E-06 |
| Ptpdc1        | 0.0000 | 0.5300 | 21.0824 | 6.91E-08 | 8.59E-06 |
| Foxp1         | 0.0000 | 0.3333 | 21.0850 | 6.88E-08 | 8.57E-06 |
| Wdr76         | 0.0000 | 0.5333 | 21.0927 | 6.81E-08 | 8.50E-06 |
| Fgd4          | 0.0000 | 0.2967 | 21.1087 | 6.65E-08 | 8.35E-06 |
| Sec16b        | 0.0000 | 0.5433 | 21.1233 | 6.51E-08 | 8.19E-06 |
| Inpp5b        | 0.0000 | 0.6000 | 21.1254 | 6.49E-08 | 8.19E-06 |
| Odr4          | 0.0000 | 0.7600 | 21.1296 | 6.46E-08 | 8.16E-06 |
| 217615        | 0.0000 | 0.9100 | 21.1908 | 5.91E-08 | 7.52E-06 |
| Esp11         | 0.0000 | 0.3733 | 21.1916 | 5.90E-08 | 7.52E-06 |
| Cpt1c         | 0.0000 | 0.8700 | 21.1957 | 5.87E-08 | 7.50E-06 |
| Mkrm1         | 0.0000 | 1.3200 | 21.2010 | 5.82E-08 | 7.46E-06 |
| Rhobtb1       | 0.0000 | 0.6533 | 21.2187 | 5.67E-08 | 7.33E-06 |
| Arhgef40      | 0.0000 | 0.5000 | 21.2189 | 5.68E-08 | 7.33E-06 |
| Ciz1          | 0.0000 | 0.9600 | 21.2189 | 5.68E-08 | 7.33E-06 |
| Ctbp2         | 0.0000 | 0.9867 | 21.2189 | 5.68E-08 | 7.33E-06 |
| Pacs2         | 0.0000 | 0.4667 | 21.2779 | 5.21E-08 | 6.86E-06 |
| Rab3d         | 0.0000 | 0.7067 | 21.3225 | 4.88E-08 | 6.51E-06 |
| Usp37         | 0.0000 | 0.3833 | 21.3519 | 4.68E-08 | 6.30E-06 |
| 2410002F23Rik | 0.0000 | 1.4833 | 21.3829 | 4.48E-08 | 6.10E-06 |
| Actn1         | 0.0000 | 0.7233 | 21.3952 | 4.40E-08 | 6.01E-06 |
| Eif2ak4       | 0.0033 | 0.5833 | 21.3952 | 4.40E-08 | 6.01E-06 |
| Misp          | 0.0000 | 1.1867 | 21.4032 | 4.35E-08 | 5.97E-06 |
| Wdr81         | 0.0000 | 0.4333 | 21.4056 | 4.33E-08 | 5.96E-06 |
| Mark2         | 0.0000 | 0.7400 | 21.4276 | 4.19E-08 | 5.80E-06 |
| Slc9a6        | 0.0000 | 0.6367 | 21.4276 | 4.19E-08 | 5.80E-06 |
| Wdsub1        | 0.0000 | 1.4867 | 21.4335 | 4.16E-08 | 5.78E-06 |
| Arrb1         | 0.0000 | 0.6933 | 21.4488 | 4.05E-08 | 5.73E-06 |
| Rab3ip        | 0.0000 | 1.0400 | 21.4824 | 3.87E-08 | 5.73E-06 |
| Ranbp3        | 0.0000 | 1.3000 | 21.5139 | 3.70E-08 | 5.69E-06 |
| Ube2d1        | 0.0133 | 2.4333 | 21.5139 | 3.70E-08 | 5.69E-06 |
| Fam49a        | 0.0000 | 0.6700 | 21.5472 | 3.52E-08 | 5.58E-06 |
| Prdm10        | 0.0000 | 0.4433 | 21.5596 | 3.46E-08 | 5.53E-06 |
| Frk           | 0.0000 | 0.6733 | 21.5689 | 3.41E-08 | 5.50E-06 |
| Scaper        | 0.0000 | 0.6300 | 21.5918 | 3.30E-08 | 5.38E-06 |
| Rere          | 0.0000 | 0.4533 | 21.5971 | 3.27E-08 | 5.38E-06 |
| Smg1          | 0.0000 | 0.2167 | 21.6020 | 3.25E-08 | 5.38E-06 |
| U2surp        | 0.0000 | 0.4800 | 21.6241 | 3.15E-08 | 5.33E-06 |
| Tia1          | 0.0000 | 0.8933 | 21.6259 | 3.14E-08 | 5.33E-06 |
| Map4k5        | 0.0000 | 0.7400 | 21.6314 | 3.11E-08 | 5.33E-06 |
| Bahd1         | 0.0000 | 0.7867 | 21.6425 | 3.06E-08 | 5.30E-06 |
| Csnk1e        | 0.0000 | 1.2567 | 21.6533 | 3.01E-08 | 5.30E-06 |
| Plec          | 0.0000 | 0.2267 | 21.6607 | 2.98E-08 | 5.27E-06 |
| Nbeal1        | 0.0000 | 0.2200 | 21.6777 | 2.91E-08 | 5.23E-06 |
| Zfp518b       | 0.0000 | 0.5333 | 21.7050 | 2.79E-08 | 5.22E-06 |
| Mtmr2         | 0.0000 | 0.9233 | 21.7455 | 2.63E-08 | 5.04E-06 |
| Ggta1         | 0.0000 | 1.0967 | 21.7701 | 2.54E-08 | 4.93E-06 |
| Fnbp1         | 0.0000 | 0.7233 | 21.8780 | 2.16E-08 | 4.57E-06 |
| Foxn3         | 0.0033 | 0.5400 | 21.9358 | 1.99E-08 | 4.49E-06 |
| Clcn3         | 0.0000 | 0.7567 | 21.9808 | 1.86E-08 | 4.31E-06 |

|               |        |        |         |          |          |
|---------------|--------|--------|---------|----------|----------|
| Gak           | 0.0000 | 1.0933 | 22.0583 | 1.65E-08 | 4.09E-06 |
| Tmem106b      | 0.0000 | 0.7567 | 22.0666 | 1.63E-08 | 4.09E-06 |
| Fam234b       | 0.0000 | 1.1600 | 22.1030 | 1.55E-08 | 4.07E-06 |
| 1600012H06Rik | 0.0000 | 2.0433 | 22.1870 | 1.36E-08 | 3.89E-06 |
| Tln2          | 0.0000 | 0.4233 | 22.2012 | 1.34E-08 | 3.82E-06 |
| Chd3          | 0.0000 | 0.7867 | 22.3377 | 1.09E-08 | 3.45E-06 |
| Rnf10         | 0.0000 | 2.2367 | 22.4342 | 9.40E-09 | 3.30E-06 |
| 1700019D03Rik | 0.0000 | 2.9667 | 23.1443 | 3.15E-09 | 1.93E-06 |
| Rap1gds1      | 0.0100 | 4.3367 | 23.6019 | 3.53E-11 | 6.79E-08 |

---
