# Supplementary material for: Discovery of a new inhibitor targeting PD-L1 for cancer immunotherapy
Source: PubMed Central journal article supplement — Neoplasia. 2021 Jan 30;23(3):281–93. doi: 10.1016/j.neo.2021.01.001 (PMC7851350; doi:10.1016/j.neo.2021.01.001), 2021-01-30
Supplement: mmc2.pdf [file mmc2.pdf]

**Supplementary Table 2. KEGG pathway terms enriched through GSEA**

| <b>Enriched KEGG pathway terms by genes down-expressed in APBC-treated group</b> |            |                  |
|----------------------------------------------------------------------------------|------------|------------------|
| <b>KEGG Pathway Term</b>                                                         | <b>NES</b> | <b>FDR q-val</b> |
| Glycolysis / Gluconeogenesis                                                     | -2.3609    | <0.0001          |
| Citrate cycle (TCA cycle)                                                        | -2.2812    | <0.0001          |
| Starch and sucrose metabolism                                                    | -2.2508    | <0.0001          |
| MAPK signaling pathway - yeast                                                   | -2.2027    | 1.51E-03         |
| Carbon metabolism                                                                | -2.1828    | 1.20E-03         |
| Pyruvate metabolism                                                              | -2.1487    | 1.00E-03         |
| Carbon fixation in photosynthetic organisms                                      | -2.1312    | 8.60E-04         |
| Microbial metabolism in diverse environments                                     | -2.1135    | 1.25E-03         |
| Glyoxylate and dicarboxylate metabolism                                          | -2.1096    | 1.11E-03         |
| Propanoate metabolism                                                            | -2.0123    | 2.96E-03         |
| Fructose and mannose metabolism                                                  | -1.8614    | 1.24E-02         |
| Biosynthesis of antibiotics                                                      | -1.8493    | 1.38E-02         |
| 2-Oxocarboxylic acid metabolism                                                  | -1.8457    | 1.33E-02         |
| Galactose metabolism                                                             | -1.8083    | 1.60E-02         |
| Fat digestion and absorption                                                     | -1.7815    | 1.90E-02         |
| Biosynthesis of amino acids                                                      | -1.7772    | 1.85E-02         |
| Hippo signaling pathway - multiple species                                       | -1.7246    | 2.75E-02         |
| Glucagon signaling pathway                                                       | -1.7157    | 2.80E-02         |
| AMPK signaling pathway                                                           | -1.7133    | 2.72E-02         |
| Hippo signaling pathway - fly                                                    | -1.6970    | 3.05E-02         |
| Biosynthesis of secondary metabolites                                            | -1.6923    | 3.01E-02         |
| Drug metabolism - cytochrome P450                                                | -1.6592    | 3.79E-02         |
| <b>Enriched KEGG pathway terms by genes up-expressed in APBC-treated group</b>   |            |                  |
| <b>KEGG Pathway Term</b>                                                         | <b>NES</b> | <b>FDR q-val</b> |
| Antigen processing and presentation                                              | 2.3567     | <0.0001          |
| TNF signaling pathway                                                            | 2.0654     | <0.0001          |
| Intestinal immune network for IgA production                                     | 2.0467     | 1.91E-04         |
| Ribosome biogenesis in eukaryotes                                                | 2.0304     | 2.87E-04         |
| NOD-like receptor signaling pathway                                              | 1.9847     | 8.54E-04         |
| DNA replication                                                                  | 1.9705     | 7.12E-04         |
| Th17 cell differentiation                                                        | 1.8540     | 4.40E-03         |
| Cytokine-cytokine receptor interaction                                           | 1.8476     | 4.38E-03         |
| Proteasome                                                                       | 1.8242     | 5.17E-03         |
| Cell cycle - yeast                                                               | 1.8070     | 6.05E-03         |
| Cytosolic DNA-sensing pathway                                                    | 1.8054     | 5.71E-03         |
| Phagosome                                                                        | 1.7748     | 7.82E-03         |
| Th1 and Th2 cell differentiation                                                 | 1.7592     | 8.77E-03         |
| Homologous recombination                                                         | 1.7336     | 1.10E-02         |
| C-type lectin receptor signaling pathway                                         | 1.7164     | 1.33E-02         |
| Aminoacyl-tRNA biosynthesis                                                      | 1.7152     | 1.26E-02         |
| Spliceosome                                                                      | 1.7102     | 1.24E-02         |
| Cell adhesion molecules (CAMs)                                                   | 1.7094     | 1.19E-02         |
| RNA transport                                                                    | 1.6819     | 1.56E-02         |
| IL-17 signaling pathway                                                          | 1.6551     | 2.00E-02         |
| Toll-like receptor signaling pathway                                             | 1.6096     | 3.01E-02         |
| Hematopoietic cell lineage                                                       | 1.6078     | 2.93E-02         |
| NF-kappa B signaling pathway                                                     | 1.5700     | 4.18E-02         |
| Fanconi anemia pathway                                                           | 1.5531     | 4.72E-02         |
